# Supplementary material for: Rapid Detection of Nocardia by Next-Generation Sequencing
Source: PubMed Central journal article supplement (PMC7040243; doi:10.3389/fcimb.2020.00013), 2020-02-18
Supplement: Data_Sheet_1.pdf [file Data_Sheet_1.pdf]

## *Supplementary Materials*

**Table S1.** Characteristics of patients in NG group

| <b>Case No.</b> | <b>Gender</b> | <b>Age(years)</b> | <b>Medical history</b>        | <b>Associated manifestations</b>                     | <b>Sites of infection</b>   |
|-----------------|---------------|-------------------|-------------------------------|------------------------------------------------------|-----------------------------|
| 1               | Male          | 38                | None                          | Dizziness, headache, fever                           | Systemic<br>(pulmonary,CNS) |
| 2               | Male          | 82                | Drug eruption                 | None                                                 | Pulmonary                   |
| 3               | Female        | 68                | None                          | Feverishness on dorsum of hand                       | Cutaneous                   |
| 4               | Female        | 42                | Pemphigus<br>(hormonotherapy) | Fever, coughing, chest tightness                     | Pulmonary                   |
| 5               | Male          | 84                | Hormonotherapy                | Headache, dizziness, fever, vomiting,<br>weight loss | CNS                         |
| 6               | Male          | 42                | Pemphigus<br>(hormonotherapy) | Fever, chest pain                                    | Pulmonary                   |

|    |        |    |                                                              |                                                  |                                         |
|----|--------|----|--------------------------------------------------------------|--------------------------------------------------|-----------------------------------------|
| 7  | Female | 42 | Pemphigus<br>(hormonotherapy)                                | Fever, coughing, chest tightness                 | Pulmonary                               |
| 8  | Female | 34 | Evan syndrome<br>(hormonotherapy)                            | Emptysis, dermal ulcer, knee pain                | Systemic<br>(pulmonary, cutaneous)      |
| 9  | Male   | 53 | Obsolete pulmonary<br>tuberculosis, Bronchiectasis           | Fever, coughing, unconsciousness,<br>weight loss | Systemic<br>(pulmonary, cutaneous, CNS) |
| 10 | Male   | 42 | Cryptococcal meningitis,<br>Latent pulmonary<br>tuberculosis | Fever, headache, blurred vision,<br>vomiting     | Systemic<br>(pulmonary, CNS)            |

**Table S2.** Treatment related information of patients in NG and CG group

| Case No.* | Suspicion for nocardiosis | Treatment before diagnosis        | Treatment after diagnosis               | Status on discharge | Co-infection            |
|-----------|---------------------------|-----------------------------------|-----------------------------------------|---------------------|-------------------------|
| 1         | No                        | Meropenem                         | Linezolid+meropenem                     | Improvement         | Hepatitis B             |
| 2         | No                        | Meropenem+voriconazole+fosfomycin | Imipenem and cilastatin sodium+amikacin | Improvement         | Pulmonary aspergillosis |
| 3         | No                        | None                              | Ceftriaxone+amikacin                    | Improvement         | None                    |

|    |     |                                                                   |                                                       |                |                                                                                             |
|----|-----|-------------------------------------------------------------------|-------------------------------------------------------|----------------|---------------------------------------------------------------------------------------------|
| 4  | No  | Voriconazole+<br>moxifloxacin+caspofungin+posaconazole            | Linezolid+meropenem                                   | Improvement    | None                                                                                        |
| 5  | No  | Meropenem+vancomycin                                              | Meropenem+sulfamethoxazole+fluconazole+ ciprofloxacin | Improvement    | None                                                                                        |
| 6  | No  | Cefoperazone sodium and sulbactam sodium+fluconazole              | Meropenem+vancomycin                                  | No progression | Pulmonary cryptococcosis; hepatitis B                                                       |
| 7  | No  | None                                                              | Sulfamethoxazole                                      | No progression | None                                                                                        |
| 8  | No  | Cefazolin                                                         | Sulfamethoxazole                                      | No progression | None                                                                                        |
| 9  | No  | Meropenem+piperacillin sodium and tazobactam sodium+metronidazole | Linezolid+amikacin                                    | Progression    | Latent tuberculosis infection; hepatitis B; severe pneumonia caused by Klebsiella pneumonia |
| 10 | Yes | sulfamethoxazole+flucytosine+fluconazole                          | Linezolid+amikacin+ceftriaxone                        | Improvement    | Cryptococcus meningitis                                                                     |

|    |     |                                                                 |                                                               |             |                                  |
|----|-----|-----------------------------------------------------------------|---------------------------------------------------------------|-------------|----------------------------------|
| 11 | No  | isoniazid+rifampicin+pyrazinamide+ethambutol+levofloxacin       | Linezolid+amikacin+ceftriaxone+levofloxacin                   | Improvement | None                             |
| 12 | Yes | Linezolid+piperacillin sodium and tazobactam sodium             | sulfamethoxazole+linezolid+penicillin                         | Improvement | None                             |
| 13 | Yes | Meropenem+linezolid                                             | Linezolid+meropenem                                           | Improvement | Hepatitis B                      |
| 14 | No  | Isoniazid+rifampicin+pyrazinamide+ethambutol                    | Sulfamethoxazole+isoniazid+rifampicin+pyrazinamide+ethambutol | Improvement | Tuberculosis infection(possibly) |
| 15 | No  | Not accessible                                                  | Sulfamethoxazole+ceftriaxone                                  | Improvement | None                             |
| 16 | No  | Isoniazid+rifampicin+pyrazinamide+ethambutol+linezolid+amikacin | Sulfamethoxazole+Meropenem+linezolid+amikacin                 | Improvement | None                             |
| 17 | No  | Meropenem+ vancomycin                                           | Sulfamethoxazole+Meropenem+linezolid                          | Improvement | None                             |
| 18 | No  | Voriconazole                                                    | Sulfamethoxazole+ceftriaxone+linezolid                        | Improvement | None                             |
| 19 | Yes | Itraconazole                                                    | Linezolid+levofloxacin                                        | Improvement | None                             |
| 20 | No  | Voriconazole                                                    | Linezolid+imipenem and cilastatin sodium                      | Improvement | Penicillium marneffeii infection |

|    |    |              |                                            |             |      |
|----|----|--------------|--------------------------------------------|-------------|------|
| 21 | No | Moxifloxacin | Imipenem and Cilastatin<br>Sodium+Amikacin | Improvement | None |
|----|----|--------------|--------------------------------------------|-------------|------|

---

\*Case 1-10 belonged to NG group, case 11-21 belonged to CG group.

**Table S3.** Sample types of all the included samples

| <b>Characteristics</b>       | <b>CG samples (16)</b> | <b>NG samples (14)</b> | <b>NN samples (55)</b> | <b>Total (85)</b> |
|------------------------------|------------------------|------------------------|------------------------|-------------------|
| Sample type                  |                        |                        |                        |                   |
| Cerebrospinal fluid          | 3 (18.8%)              | 5 (35.7%)              | 39 (70.9%)             | 47 (55.3%)        |
| Bronchoalveolar lavage fluid | 3 (18.8%)              | 4 (28.6%)              | 10 (18.2%)             | 17 (20.0%)        |
| Sputum                       | 2 (12.5%)              | 2 (14.3%)              | 2 (3.6%)               | 6 (7.1%)          |
| Lung tissue                  | 0 (0%)                 | 2 (14.3%)              | 0 (0%)                 | 2 (2.4%)          |
| Cutaneous pus                | 3 (18.8%)              | 1 (7.1%)               | 0 (0%)                 | 4 (4.7%)          |
| Skin tissue                  | 0 (0%)                 | 0 (0%)                 | 4 (7.3%)               | 4 (4.7%)          |
| Blood (Plasma for NGS)       | 3 (18.8%)              | 0 (0%)                 | 0 (0%)                 | 3 (3.5%)          |
| Urine                        | 1 (6.3%)               | 0 (0%)                 | 0 (0%)                 | 1 (1.2%)          |

Pleural effusion

1 (6.3%)

0 (0%)

0 (0%)

1 (1.2%)

---

**Table S4.** NGS data of patients in NG group

| Case No. | Species                          | Sample type   | Reads | Rank | Proportion Rate |
|----------|----------------------------------|---------------|-------|------|-----------------|
| 1        | <i>Nocardia farcinica</i>        | BALF          | 208   | 1    | 0.76752768      |
| 2        | <i>Nocardia farcinica</i>        | BALF          | 7767  | 1    | 0.90313953      |
| 3        | <i>Nocardia brasiliensis</i>     | Cutaneous pus | 17    | 1    | 0.77272727      |
| 4        | <i>Nocardia brasiliensis</i>     | Sputum        | 332   | 1    | 0.58865248      |
| 5        | <i>Nocardia farcinica</i>        | CSF           | 2712  | 1    | 0.84302145      |
| 6        | <i>Nocardia africana</i>         | Lung tissue   | 495   | 1    | 0.60736196      |
| 6        | <i>Nocardia africana</i>         | CSF           | 590   | 1    | 0.55037313      |
| 7        | <i>Nocardia cyriacigeorgica</i>  | BALF          | 42    | 1    | 0.97674419      |
| 8        | <i>Nocardia brasiliensis</i>     | Sputum        | 2     | 1    | 0.5             |
| 9        | <i>Nocardia terpenica</i>        | CSF           | 617   | 2    | 0.18254438      |
| 9        | <i>Nocardia terpenica</i>        | CSF           | 41    | 1    | 0.83673469      |
| 9        | <i>Nocardia terpenica</i>        | CSF           | 54    | 1    | 0.2231405       |
| 10       | <i>Nocardia otitidiscaviarum</i> | BALF          | 155   | 1    | 0.68281938      |



|    |                                  |             |       |   |            |
|----|----------------------------------|-------------|-------|---|------------|
| 10 | <i>Nocardia otitidiscaviarum</i> | Lung tissue | 16143 | 1 | 0.78072254 |
|----|----------------------------------|-------------|-------|---|------------|

---

CSF: Cerebrospinal Fluid; BALF: Bronchoalveolar Lavage Fluid

**Table S5.** NGS data of patients in NN group

| <b>Case No.</b> | <b>Species</b>               | <b>Sample type</b> | <b>Reads</b> | <b>Rank</b> | <b>Proportion Rate</b> |
|-----------------|------------------------------|--------------------|--------------|-------------|------------------------|
| 22              | Nocardia                     | Skin tissue        | 0            | 67          | 0.000822966            |
| 23              | Nocardia                     | Skin tissue        | 0            | 15          | 0.010557634            |
| 24              | Nocardia                     | Skin tissue        | 0            | 105         | 2.68351E-06            |
| 25              | <i>Nocardia brasiliensis</i> | Skin tissue        | 8            | 248         | 0.000595166            |
| 26              | Nocardia                     | Sputum             | 0            | 162         | 2.25644E-06            |
| 27              | Nocardia                     | Sputum             | 0            | 93          | 1.77655E-05            |
| 28              | Nocardia                     | BALF               | 0            | 78          | 6.96341E-05            |
| 29              | Nocardia                     | BALF               | 0            | 98          | 1.95951E-05            |
| 30              | Nocardia                     | BALF               | 0            | 115         | 5.42248E-05            |
| 31              | Nocardia                     | BALF               | 0            | 212         | 5.71788E-05            |
| 32              | Nocardia                     | BALF               | 0            | 164         | 1.96199E-05            |
| 33              | Nocardia                     | BALF               | 0            | 81          | 6.99848E-05            |
| 34              | Nocardia                     | BALF               | 0            | 189         | 2.65677E-05            |
| 35              | Nocardia                     | BALF               | 0            | 177         | 5.30294E-06            |
| 36              | Nocardia                     | BALF               | 0            | 215         | 0.000245557            |
| 37              | Nocardia                     | BALF               | 0            | 142         | 0.000168214            |
| 38              | Nocardia                     | CSF                | 0            | 147         | 0.000276185            |
| 39              | Nocardia                     | CSF                | 0            | 78          | 0.001079721            |
| 40              | Nocardia                     | CSF                | 0            | 322         | 0.000789636            |

|    |          |     |   |     |             |
|----|----------|-----|---|-----|-------------|
| 41 | Nocardia | CSF | 0 | 33  | 0.002545873 |
| 42 | Nocardia | CSF | 0 | 132 | 0.001434436 |
| 43 | Nocardia | CSF | 0 | 256 | 0.000769133 |
| 44 | Nocardia | CSF | 0 | 341 | 0.000460184 |
| 45 | Nocardia | CSF | 0 | 185 | 0.000570775 |
| 46 | Nocardia | CSF | 0 | 101 | 0.001220753 |
| 47 | Nocardia | CSF | 0 | 91  | 0.000460373 |
| 48 | Nocardia | CSF | 0 | 163 | 0.000190162 |
| 49 | Nocardia | CSF | 0 | 71  | 0.000120636 |
| 50 | Nocardia | CSF | 0 | 309 | 0.00021545  |
| 51 | Nocardia | CSF | 0 | 152 | 0.000360039 |
| 52 | Nocardia | CSF | 0 | 340 | 0.000538973 |
| 53 | Nocardia | CSF | 0 | 184 | 0.00053068  |
| 54 | Nocardia | CSF | 0 | 94  | 0.001268534 |
| 55 | Nocardia | CSF | 0 | 272 | 0.00040867  |
| 56 | Nocardia | CSF | 0 | 168 | 5.0688E-05  |
| 57 | Nocardia | CSF | 0 | 268 | 0.000610783 |
| 58 | Nocardia | CSF | 0 | 91  | 0.0003985   |
| 59 | Nocardia | CSF | 0 | 137 | 0.000483494 |
| 60 | Nocardia | CSF | 0 | 269 | 0.000135084 |
| 61 | Nocardia | CSF | 0 | 195 | 0.00028278  |
| 62 | Nocardia | CSF | 0 | 224 | 0.000380698 |

|    |                             |     |   |     |             |
|----|-----------------------------|-----|---|-----|-------------|
| 63 | <i>Nocardia</i>             | CSF | 0 | 181 | 8.69734E-05 |
| 64 | <i>Nocardia</i>             | CSF | 0 | 330 | 0.000348292 |
| 65 | <i>Nocardia terpenica</i>   | CSF | 2 | 201 | 0.000424383 |
| 66 | <i>Nocardia asteroides</i>  | CSF | 2 | 177 | 0.000670529 |
| 67 | <i>Nocardia paucivorans</i> | CSF | 2 | 161 | 0.00022756  |
| 68 | <i>Nocardia africana</i>    | CSF | 1 | 110 | 0.000237176 |
| 69 | <i>Nocardia asiatica</i>    | CSF | 1 | 95  | 0.00068315  |
| 70 | <i>Nocardia nova</i>        | CSF | 2 | 124 | 0.00035189  |
| 71 | <i>Nocardia concava</i>     | CSF | 5 | 136 | 0.000620607 |
| 72 | <i>Nocardia higoensis</i>   | CSF | 4 | 125 | 0.00017582  |
| 73 | <i>Nocardia asiatica</i>    | CSF | 4 | 172 | 0.00059175  |
| 74 | <i>Nocardia terpenica</i>   | CSF | 1 | 145 | 0.000497218 |
| 75 | <i>Nocardia higoensis</i>   | CSF | 1 | 48  | 0.000430326 |
| 76 | <i>Nocardia arizonensis</i> | CSF | 8 | 177 | 0.000203584 |

---

CSF: Cerebrospinal Fluid; BALF: Bronchoalveolar Lavage Fluid

**Table S6.** Turn-around time of NGS and culture of patients in NG group

| Case No. | Species                          | Sample type   | Turn-around time of NGS (days) | Turn-around time of culture (days) |
|----------|----------------------------------|---------------|--------------------------------|------------------------------------|
| 1        | <i>Nocardia farcinica</i>        | BALF          | 2                              | \                                  |
| 2        | <i>Nocardia farcinica</i>        | BALF          | 2                              | 4                                  |
| 3        | <i>Nocardia brasiliensis</i>     | Cutaneous pus | 2                              | 2                                  |
| 4        | <i>Nocardia brasiliensis</i>     | Sputum        | 2                              | 5                                  |
| 5        | <i>Nocardia farcinica</i>        | CSF           | 2                              | \                                  |
| 6        | <i>Nocardia africana</i>         | CSF           | 2                              | \                                  |
| 6        | <i>Nocardia africana</i>         | Lung tissue   | 2                              | \                                  |
| 7        | <i>Nocardia cyriacigeorgica</i>  | BALF          | 2                              | \                                  |
| 8        | <i>Nocardia brasiliensis</i>     | Sputum        | 2                              | 4                                  |
| 9        | <i>Nocardia terpenica</i>        | CSF           | 2                              | \                                  |
| 9        | <i>Nocardia terpenica</i>        | CSF           | 2                              | 32                                 |
| 9        | <i>Nocardia terpenica</i>        | CSF           | 2                              | \                                  |
| 10       | <i>Nocardia otitidiscaviarum</i> | BALF          | 2                              | \                                  |
| 10       | <i>Nocardia otitidiscaviarum</i> | Lung tissue   | 2                              | \                                  |

\* For samples which finally obtained culture-positive results, times of culture referred to the total culture times until the final culture-positive result came out. For samples which failed to obtain a culture-positive result, times of culture referred to total culture times during the hospitalization.

\*\* BALF and sputum were included.

\*\*\* Lung tissue, BALF and sputum were included.

**Table S7.** Turn-around time of culture of patients in CG group and part of the patients in NG group

| Case No.* | Species                      | Sample type      | Turn-around time (days) |
|-----------|------------------------------|------------------|-------------------------|
| 4         | <i>Nocardia brasiliensis</i> | Sputum           | 5                       |
| 8         | <i>Nocardia brasiliensis</i> | Sputum           | 4                       |
| 3         | <i>Nocardia brasiliensis</i> | Cutaneous pus    | 2                       |
| 9         | <i>Nocardia terpenica</i>    | CSF              | 32                      |
| 2         | <i>Nocardia farcinica</i>    | BALF             | 4                       |
| 11        | <i>Nocardia</i>              | Urine            | 5                       |
| 12        | <i>Nocardia</i>              | Pus              | 4                       |
| 13        | <i>Nocardia</i>              | Pus              | 3                       |
| 14        | <i>Nocardia</i>              | Pleural Drainage | 6                       |
| 15        | <i>Nocardia</i>              | CSF              | 6                       |
| 16        | <i>Nocardia</i>              | CSF              | 4                       |
| 17        | <i>Nocardia</i>              | Blood            | 7                       |
| 18        | <i>Nocardia</i>              | Blood            | 10                      |
| 19        | <i>Nocardia</i>              | Blood            | 14                      |
| 20        | <i>Nocardia</i>              | BALF             | 6                       |
| 21        | <i>Nocardia</i>              | BALF             | 8                       |

CSF: Cerebrospinal Fluid; BALF: Bronchoalveolar Lavage Fluid

\*Case 4,8,3,9,2 belonged to NG group, case 11-21 belonged to CG group.
